# **The global burden of HIV among Long-distance truck drivers: A systematic review and meta-analysis**

Cyrus Mutie<sup>1\*</sup>, Berrick Otieno<sup>2,3</sup>, Elijah Mwangi<sup>1</sup>, Rosemary Kawira<sup>4</sup>, Albanus Mutisya<sup>5</sup>, John Gachohi<sup>6,7,8</sup>, Grace Mbuthia<sup>1</sup>

1 Department of Community Health Nursing, Jomo Kenyatta University of Agriculture and Technology, Nairobi, Kenya

2 Department of Public Health, Pwani University, Kilifi, Kenya

3 Kenya Medical Research Institute (KEMRI)-Wellcome Trust, Kilifi, Kenya

4 Department of Nursing Education, Leadership and Management, Jomo Kenyatta University of Agriculture and Technology, Nairobi, Kenya

5 Department of General Nursing, Jomo Kenyatta University of Agriculture and Technology, Nairobi, Kenya

6 Department of Environmental Health and Disease Control, Jomo Kenyatta University of Agriculture and Technology, Nairobi, Kenya

7 Washington State University, Global Health–Kenya, Nairobi, Kenya

8 Paul G. Allen School of Global Health, Washington State University, Pullman, USA

\* Corresponding author

Email: [paulmutiecyrus@gmail.com](mailto:paulmutiecyrus@gmail.com)

## 1 **Abstract**

2 Long-distance truck drivers (LDTDs) endure a disproportionately high burden of HIV in various  
3 global settings. However, unlike other most at-risk populations, the global burden of HIV among  
4 LDTDs has not been documented so far. The result has been poor allocation and distribution of  
5 the limited HIV preventive resources for LDTDs in most parts of the world. Thus, a systematic  
6 review and meta-analysis were conducted to assess the global burden of HIV among LDTDs.

7 A comprehensive electronic search was conducted in PubMed, ProQuest Central, PubMed Central,  
8 CINAHL, and Global Index Medicus to identify relevant information published in English on HIV  
9 prevalence among LDTDs from 1989 to the 16<sup>th</sup> of May 2023. A random-effects meta-analysis  
10 was conducted to establish the burden of HIV at global and regional levels. The Joanna Briggs  
11 Institute (JBI) and Newcastle-Ottawa Scale (NOS) tools were used to assess the quality of the  
12 included studies.

13 Of the 1787 articles identified, 43 were included. Most of the included studies were conducted in  
14 sub-Saharan Africa (44.19%, n=19), and Asia and the Pacific (37.21%, n=16). The pooled  
15 prevalence of HIV was 3.82%. The burden of HIV was highest in sub-Saharan Africa at 14.34%,  
16 followed by Asia and the Pacific at 2.14%, and lastly Western, Central Europe and North America  
17 at 0.17%. The overall heterogeneity score was ( $I^2 = 98.2\%$ ,  $p < 0.001$ ).

18 The global burden of HIV among LDTDs is 3.82%, six times higher than that of the general  
19 population globally. Compared to other regions, the burden of HIV is highest in sub-Saharan  
20 Africa at 14.34%, where it's estimated to be 3% in the general population. Thus, LDTDs endure a  
21 disproportionately high burden of HIV compared to other populations. Consequently, more  
22 LDTD-centred HIV research and surveillance is needed at national and regional levels to institute  
23 tailored preventive policies and interventions.

24 **PROSPERO Number:** CRD42023429390

25

## 26 **Introduction**

27 Globally, the incidence rate of HIV has declined by 38%, from 2.1 million in 2010 to 1.3 million  
28 in 2022 [1]. While significant declines as high as 57% have occurred in Eastern and Southern  
29 Africa, the incidence rate of HIV has increased by 61% in the Middle East and North Africa, and  
30 49% in Eastern Europe and Central Asia [1]. The declines point to key milestones that have so far  
31 been made in the control and prevention of HIV/AIDS, however, the increasing incidence rates in  
32 some parts of the world may derail the global efforts to end the epidemic [1]. Moreover, the  
33 declines may mask the disproportionately high burden of HIV endured among certain key  
34 population groups like female sex workers (FSWs) [2] and the hard-to-reach populations like the  
35 Long-distance truck drivers (LDTDs) [3,4].

36  
37 Studies have identified several factors likely to drive a high burden of HIV among LDTDs. These  
38 include; sexual risk behaviours like poor condom use [5–8], multiple sexual partners [9–11], illicit  
39 drug and alcohol use during or before sexual interactions [10,12–14], and risky sexual networks  
40 [15–18]. Notably, LDTDs’ stopovers along their transit routes are characterized by prevalent  
41 commercial sex from FSWs whose risk of HIV infection is also high [19]. Indeed, according to  
42 UNAIDS, FSWs were thirty times more likely to contract HIV in 2021, positioning their sexual  
43 clients like LDTDs at a high-risk profile of contracting and spreading the infection [20]. The  
44 LDTDs’ stopovers often lack proper HIV prevention measures, such as access to condoms,  
45 information, and HIV testing services, further exacerbating the risk of transmission [21].  
46 Additionally, mental exhaustion and psychosocial problems due to long working hours while in  
47 transit have been implicated as predictors of risky sexual behaviours likely to elevate the burden  
48 of HIV among LDTDs [22–25]. Moreover, LDTDs’ varying eligibility for HIV preventive services

49 across different geographic borders [26], constant mobility [27,28], and missed clinic  
50 appointments [21,24,29] limit their access to essential preventive services, further predisposing  
51 them to the risk of HIV.

52

53 The burden of HIV among LDTDs has far-reaching health implications. In addition to the negative  
54 health outcomes for the drivers themselves, their frequent contact with other individuals, including  
55 their partners, FSWs, and other populations along transit routes, increases the risk of HIV  
56 transmission to the general population. Unlike other high-risk groups like FSWs, there has been  
57 paucity of information on the burden of HIV among the LDTDs at global, regional and national  
58 levels.

59

60 The undetermined burden of HIV among LDTDs is most likely to be succeeded by a lack of  
61 targeted HIV prevention interventions, resulting in poor use and allocation of scarce health  
62 resources. Hitherto, no systematic review has been done to quantify the global burden of HIV  
63 among LDTDs. Previous reviews have summarized the prevalence of HIV among LDTDs at  
64 national levels in Ethiopia [30] and China [31], limiting the generalizability of their findings to  
65 other global settings. Therefore, with the increasing efforts to fight HIV, especially among the  
66 most at-risk populations, an extensive review is warranted to put into perspective the global burden  
67 of HIV among LDTDs. To address the aforementioned gap, this study set out to systematically  
68 summarize and analyse the available evidence on HIV prevalence among LDTDs from various  
69 parts of the world.

70 A review of this kind may amplify the evidence needed to guide surveillance, and allocation of  
71 preventive resources, strategies and policies to reduce the burden of HIV among LDTDs in various

72 parts of the world. More specifically, this review contributes to achieving the UNAIDS 95-95-95  
73 targets by the year 2025 and the global goal to end AIDS by 2030 [1,20].

74

## 75 **Methods**

### 76 **Protocol and Registration**

77 A protocol for this study was developed and registered in the International Prospective Register of  
78 Systematic Reviews (PROSPERO) under registration number CRD42023429390. The study  
79 followed the Preferred Reporting Items for Systematic Review and Meta-analysis (PRISMA)  
80 guidelines [32]. A PRISMA checklist is provided (S1 Table)

81

### 82 **Eligibility Criteria**

83 Articles identified from the electronic search had to meet pre-determined inclusion and exclusion  
84 criteria to be included. The inclusion and exclusion criteria were categorized into condition (HIV),  
85 context (where the studies were conducted), population of interest (Long-distance truck drivers)  
86 and the study design. A summary of the inclusion and exclusion criteria for the selected studies is  
87 given in Table 1.

88

89

90 **Table 1.** Inclusion and exclusion criteria for selected studies

| <b>Inclusion</b>                                                                                                                                                                                                                              | <b>Exclusion</b>                                                                                                                                                                                                                                                                                                                                                            |
|-----------------------------------------------------------------------------------------------------------------------------------------------------------------------------------------------------------------------------------------------|-----------------------------------------------------------------------------------------------------------------------------------------------------------------------------------------------------------------------------------------------------------------------------------------------------------------------------------------------------------------------------|
| <b>Condition</b><br>Studies on prevalence, frequency, proportion, burden or risk of HIV.<br>Studies reporting on sexually transmitted infections, HIV included.<br>Studies reporting on the specific validated HIV laboratory testing method. | Studies not specific on the quantification of HIV (not specific on prevalence, frequency, proportion, burden or risk of HIV).<br>Studies reporting prevalence of other sexually transmitted infections without inclusion of HIV.                                                                                                                                            |
| <b>Context</b><br>Studies that are specific on the region/country/place in which the study was conducted.                                                                                                                                     | Studies not specific on which parts of the world the data was collected.                                                                                                                                                                                                                                                                                                    |
| <b>Population</b><br>Studies reporting HIV status among long-distance truck drivers from all parts of the world.<br>Studies reporting on HIV status of assistants of long-distance truck drivers.                                             | Studies reporting HIV status among drivers not covering long distances.<br>Studies reporting HIV status among drivers of other vehicles besides long distance trucks.<br>Studies only reporting HIV status of sexual partners of long-distance truck drivers.<br>Studies reporting on HIV- status of assistants of long-distance truck drivers not covering long distances. |
| <b>Studies</b><br>Cross-sectional studies.<br>Studies with specified sample sizes.<br>Cohort studies.<br>Interventional studies (baseline outcomes).                                                                                          | Review papers (scoping reviews, systemic reviews and meta-analysis).<br>Case-reports.<br>Case-series studies.<br>Studies with unspecified sample sizes.<br>Books and Book reviews.<br>Qualitative studies (phenomenological studies, ethnographic studies, grounded theories).<br>Publications from conference proceedings, workshops and seminars.                         |

91

## 92 **Information sources**

93 A comprehensive structured electronic search was conducted in PubMed, PMC (PubMed Central),

94 CINAHL (Cumulated Index to Nursing and Allied Health Literature), ProQuest Central, and

95 Global Index Medicus to identify all relevant studies published since inception to 16<sup>th</sup> of May 2023  
96 (when the last search was conducted). Additional studies were manually searched from the list of  
97 references available from the full-text articles retrieved.

98

## 99 **Search strategy**

100 The basic search terms were divided into three categories: 1. Condition (HIV OR AIDS OR  
101 HIV/AIDS OR Sexually transmitted diseases; 2. Population (Long-distance truck drivers OR  
102 Long-distance truckers OR Long-haul truck drivers; and 3. Outcome measures (prevalence OR  
103 burden OR risk). Synonyms in each of the search categories were combined with the Boolean  
104 operator “OR”. The three search categories were combined with the Boolean operator “AND” to  
105 form the following search string (HIV OR AIDS OR HIV/AIDS OR “Human immunodeficiency  
106 virus” OR “Immune suppression” OR “Immuno-suppression” OR “Acquired immune deficiency  
107 syndrome” OR “sexually transmitted diseases” OR “sexually transmitted infections” OR “venereal  
108 diseases” OR “venereal infections”) AND (prevalence OR burden OR proportion OR  
109 epidemiology OR frequency OR risk) AND (Truckers OR “Long-distance truckers” OR “Long-  
110 distance truck drivers” OR “Long-haul drivers” OR “Long-haul truck drivers” OR “Long-haul  
111 truck assistants” OR “Long-distance truck assistants” OR “Migrant truck drivers” OR “Migrant  
112 truck assistants”). Medical Subject Headings (MeSH) terms were also used where applicable.  
113 Where the search was unsuitable for a database, it was modified accordingly. All searches were  
114 restricted to studies published in English. Search strings from PubMed and PMC databases are  
115 provided (S1 File).

116



## 117 **Selection process**

118 Two reviewers C.M, and B.O. independently screened the records for eligibility in three stages. In  
119 the first stage, deduplication was done using the Zotero bibliography software. This was followed  
120 by the screening of titles and abstracts using the Rayyan online platform [33]. In the third stage,  
121 full-text articles were assessed for eligibility. Illegible studies were removed, and their  
122 bibliographic details listed with specific reasons. Any disagreements between the two reviewers  
123 were resolved by a third author G.M.

124

## 125 **Data extraction and data items**

126 Using a standardized Microsoft Excel data extraction form, C.M independently extracted the  
127 following variables from the retrieved articles: (a) details of the retrieved articles (author and year  
128 of publication); (b) details of the study (year the study was conducted, country, continent, region,  
129 economic class of the country of origin, community or hospital-based, and study design); (c)  
130 characteristics of study participants (sample size, gender, and age); (d) measures of outcome  
131 (laboratory method used to diagnose HIV, number of HIV positives, HIV prevalence, levels of  
132 HIV infection compared to the general population, predicting factors and quality scores).  
133 Thereafter, B.O. went through the extracted data, flagged possible anomalies and resolved them  
134 through a consensus with C.M. These variables were coded appropriately in an Excel spreadsheet,  
135 to enable ease in data synthesis and analysis.

136

## 137 **Risk of bias and quality assessment**

138 Two reviewers, C.M. and B.O. independently assessed the risk of bias and quality for each study.  
139 This was done using the Joanna Briggs Institute (JBI) critical appraisal tools [34,35] for cross-  
140 sectional (prevalence) studies and non-randomized interventional (quasi-experimental) studies,  
141 and the Newcastle-Ottawa Scale (NOS) for assessing the quality and bias of cohort studies [36].  
142 The quality of the prevalence studies was graded based on nine items in the JBI checklist.  
143 Following the NOS recommendations, the grading of the cohort studies was based on stars and  
144 categorized as follows; 0-4 Unsatisfactory; 5-6 Satisfactory; 7-8 Good; and 9-10 Very good.  
145 Additionally, publication bias was assessed using funnel plots (Fig 3).

146

## 147 **Strategy for data synthesis**

148 The reviewers derived individual study proportions by dividing the number of HIV- positive cases  
149 reported by the size of the sample studied and then computed the overall crude prevalence  
150 estimates expressed per 100 participants, for the positive cases stratified according to age and study  
151 region among other potential correlates. To obtain a more precise estimate of the overall  
152 prevalence of HIV and to assess for heterogeneity across studies, a meta-analysis of prevalences  
153 using the random-effects model was performed using R version 4.3.1 [37]. The researchers  
154 transformed reported prevalences using logit transformation to have them follow a normal  
155 distribution, hence ensuring an accurate estimate of the summary prevalences, where the logit  
156 transformation of the prevalence and its inverse variance weight were calculated as;  $\ln(p/1-p)$  and  
157  $wl = np(1-p)$  respectively [38].

158 After the analysis, the transformed prevalence and the confidence intervals were back-transformed  
159 to prevalence for reporting. A formal  $\chi^2$  test with a Q-statistic was used to assess for study

160 heterogeneity under a null hypothesis of homogeneity among the study effect sizes [39], as  
161 heterogeneity could result from study sampling error or between studies' variability due to true  
162 effect size differences across reported studies. Also, because of the variation in methodological  
163 approaches, sample sizes, and the study settings, heterogeneity was anticipated. The researchers  
164 applied a random-effects model to quantify the degree of heterogeneity using the  $I^2$  statistic, where  
165 it was assumed that  $I^2$  values of 25, 50, and 75% indicate low, moderate, and high heterogeneity,  
166 respectively, as the values of  $I^2$  increase with increasing levels of heterogeneity [40]. Forest plot  
167 was used to visualize the heterogeneity among studies, prevalence estimates, and their confidence  
168 intervals. Visual inspection of the degree of asymmetry was done using funnel plots to assess  
169 potential publication bias. Further, a univariable and multivariable meta-regression analyses were  
170 done to investigate factors attributable to heterogeneity.

171

## 172 **Analysis of subgroups or subsets**

173 The reviewers investigated potential factors that could explain the variability in prevalence  
174 estimates across the studies when  $I^2$  values are substantial using meta-regression univariable and  
175 multivariable models. This was performed using logit transformed proportions, individual effect  
176 sizes, and their corresponding sampling variances. Factors such as year of study publication, the  
177 continent of the study, country income classification, study setting, age group, country of study,  
178 measurement tool used, , sample size, and quality score of the study were investigated to examine  
179 and quantify the magnitude of their impact on prevalence estimates.

180

## 181 **Results**

### 182 **Study Selection**

183 The initial electronic search yielded a total of 1787 articles from five databases (PubMed, n=150;  
184 PMC, n=746; ProQuest Central, n=834; CINAHL, n=51, and Global Index Medicus, n=6). An  
185 additional 12 articles were identified from the reference list and Google Scholar. A total of 63  
186 duplicates were removed, after which 1736 articles were screened for eligibility. Out of these,  
187 1634 irrelevant records were excluded based on their title and abstract. After screening the  
188 remaining 102 full texts, 43 studies were included in the review and meta-analysis. A PRISMA  
189 flow chart for the systematic review process is shown in Fig 1.

190

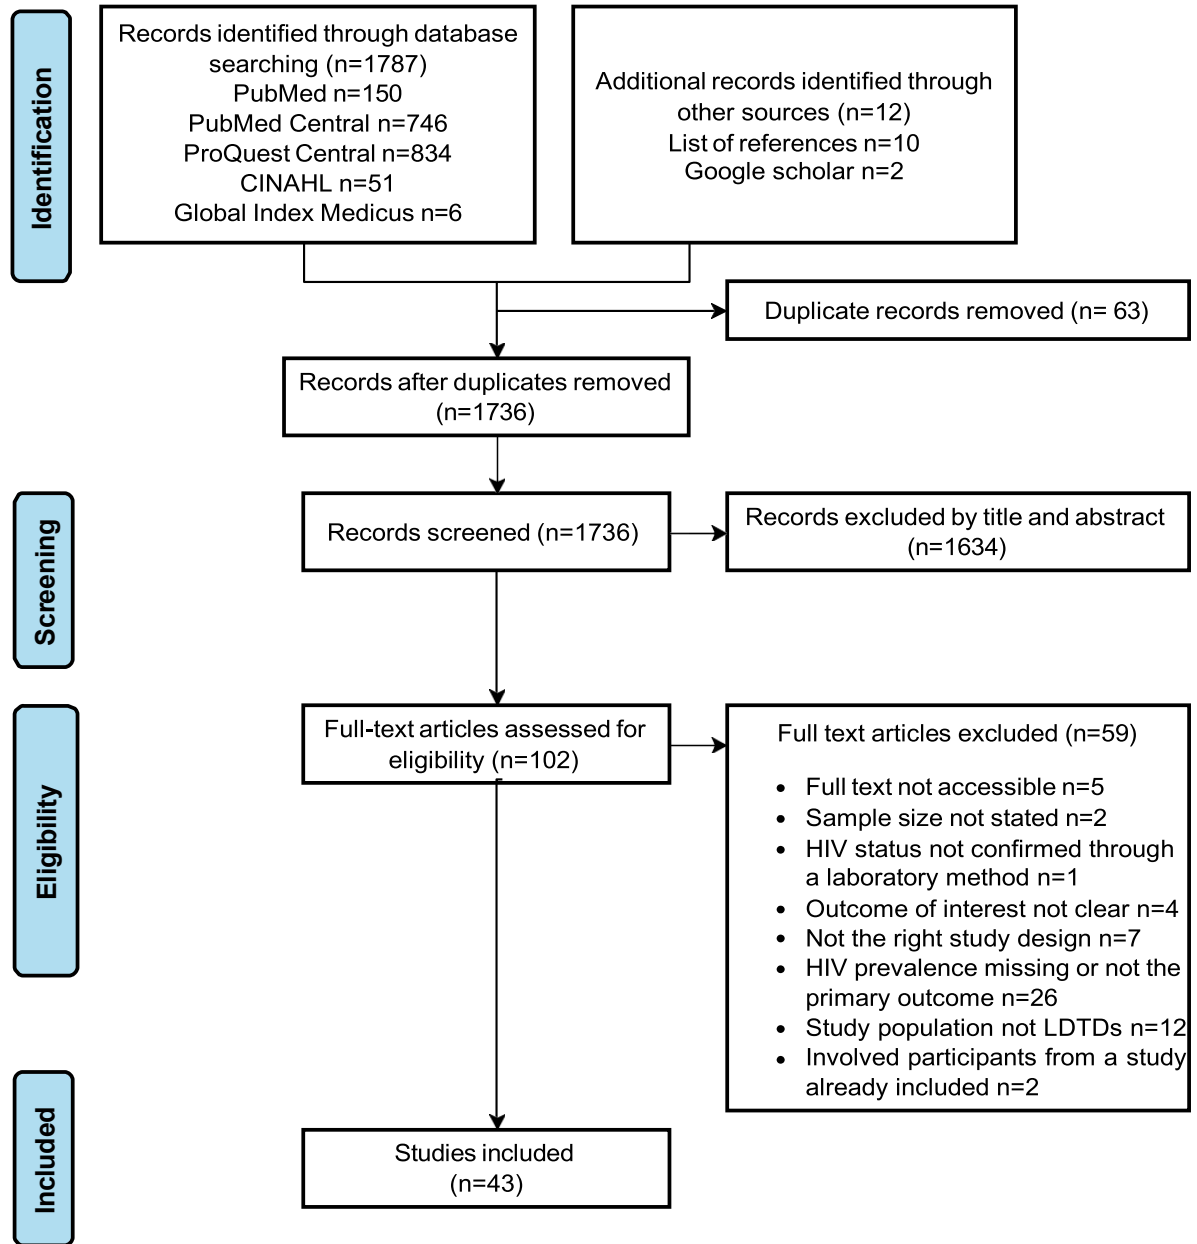

191  
192 **Fig 1.** PRISMA flowchart illustrating the systematic review process.

193

## 194 **Study characteristics**

195 A detailed summary of the 43 included studies is provided (S2 Table). Most of the included studies  
196 (65.12%, n=28), were published between 1989 and 2010, except for (34.81%, n=15) published  
197 from 2011 and onwards. A majority of the included studies were conducted in sub-Saharan Africa

198 (44.19%, n=19), followed by Asia and the Pacific (37.21%, n=16), with Eastern Europe and  
199 Central Asia trailing behind with only one study. Studies from sub-Saharan Africa were mostly  
200 conducted in Kenya (n=5), and South Africa (n=4), whereas in Asia and the Pacific, most of them  
201 were conducted in India (n=12). A map showing the geographical distribution of the studies is  
202 given in Fig 2. Almost all of the included studies (90.7%, n=39) were cross-sectional by design  
203 [3,9,11,27,41–75] except for two prospective cohort studies [76,77] and two non-randomized  
204 interventional studies [78,79].

205

206 **Fig 2.** Global distribution of the included studies for prevalence of HIV among long-distance  
207 truck drivers

208

## 209 **Study population**

210 The 43 included studies comprised a total sample size of 34,847, ranging from 68 [50] to 3,763  
211 [47] by individual studies. By region, the highest sample size was Asia and the Pacific (n=15,871,  
212 45.54%) followed by sub-Saharan Africa (n=10,014, 28.74%). Only one included study [75]  
213 involved both male and female LDTDs, whereas the rest had predominantly male participants.  
214 Most of the included studies (79.07%, n=34) targeted LDTDs as the primary study population,  
215 except for [45,58,59,63,66–68,76,77], which involved a mixture of LDTDs and other study  
216 populations (S2 Table).

217

## 218 **Laboratory method of HIV diagnosis**

219 The enzyme-linked immune-sorbent assay (ELISA) was widely used as the laboratory method of  
220 diagnosing HIV in most (74.42%, n=32) of the included studies, except for [41,50,51,54,66,73,75]  
221 where a combination of ELISA and Western Blot Assay technologies were used. Other individual  
222 studies used enzyme immunoassay (EIA) and Innostest HIV-1/HIV-2 [64], Orasure [3], Determine  
223 & Oraquick [47], and OraQuick [44] (S2 Table).

224

## 225 **HIV Prevalence estimates**

226 The pooled prevalence of HIV among LDTDs in all global regions was 3.82% (95% CI 2.22-6.49)  
227 as shown in table 2. In the sub-group analysis by region, the highest prevalence of HIV among  
228 LDTDs was from sub-Saharan Africa 14.34% (95% CI 9.94-20.26), followed by Asia and Pacific  
229 2.14% (95% CI 1.01-4.51), Eastern Europe and Central Asia 1.54% (95% CI 1.17-1.99), Latin  
230 America and Caribbean 0.37% (95% CI 0.08-1.60), Middle East and North Africa 0.27% (95% CI  
231 0.08-0.93), and lastly Western, Central Europe and North America registering the lowest estimates  
232 of 0.17% (95% CI -0.03-0.82). In sub-Saharan Africa highest prevalence rates (above 15%) were  
233 reported in South Africa [3,72], Uganda [50], Kenya [49,65,77], Burkina Faso [62] and Cameroon  
234 [67]. In the Asia and Pacific region, the highest HIV prevalence estimates were from India  
235 [11,55,58,64,69], whereas China registered the lowest prevalence rates [51]. In Latin America and  
236 the Caribbean, the highest HIV prevalence estimates were from Brazil [60]. In the other regions,  
237 there were no wide variations in the HIV prevalence reported from individual countries. Details of

238 the pooled prevalence in the different studies are given in Table 2. Forest plots showing more  
239 details of sub-group analysis are given (S3 Table).



240 **Table 2.** Pooled prevalence and subgroup analysis of the burden of HIV among long-distance truck drivers

| <b>Classification</b>    | <b>Categories</b>                         | <b>Number of Studies<br/>n (%)</b> | <b>Number of HIV Infections<br/>(n)</b> | <b>Prevalence of HIV<br/>(%)</b> | <b>95% CI</b> | <b>HIV Negative<br/>n (%)</b> | <b>Total Sample<br/>Size<br/>n (%)</b> | <b>Heterogeneity (I<sup>2</sup>)<br/>Score<br/>%, p-value</b> |
|--------------------------|-------------------------------------------|------------------------------------|-----------------------------------------|----------------------------------|---------------|-------------------------------|----------------------------------------|---------------------------------------------------------------|
| <b>Overall</b>           |                                           | 43                                 | 2309                                    | 3.82                             | 2.22-6.49     | 32538 (93.4)                  | 34847                                  | 98.2, p < 0.001                                               |
| <b>Continent</b>         | Africa                                    | 19 (44.19)                         | 1774                                    | 14.34                            | 9.94-20.26    | 8240 (82.3)                   | 10014 (28.74)                          | 97.0, p < 0.01                                                |
|                          | Asia                                      | 19 (44.19)                         | 524                                     | 1.75                             | 0.87-3.51     | 20124 (97.5)                  | 20648 (59.25)                          | 96.5, p < 0.01                                                |
|                          | North America                             | 2 (4.65)                           | 1                                       | 0.17                             | 0.03-0.82     | 901 (99.9)                    | 902 (2.59)                             | 0.0, p = 0.92                                                 |
|                          | South America                             | 3 (6.98)                           | 10                                      | 0.37                             | 0.8-1.60      | 3273 (99.7)                   | 3283 (9.42)                            | 77.0, p = 0.01                                                |
| <b>UNAIDS<br/>Region</b> | Asia and the Pacific                      | 16 (37.21)                         | 464                                     | 2.14                             | 1.01-4.51     | 15407 (97.08)                 | 15871 (45.54)                          | 96, p < 0.01                                                  |
|                          | Eastern Europe and Central Asia           | 1 (2.33)                           | 58                                      | 1.54                             | 1.17-1.99     | 3705 (98.46)                  | 3763 (10.8)                            | NA                                                            |
|                          | Latin America and The Caribbean           | 3 (6.98)                           | 10                                      | 0.37                             | 0.08-1.60     | 3273 (96.7)                   | 3283 (9.42)                            | 77, p = 0.01                                                  |
|                          | Middle East and North Africa              | 2 (4.65)                           | 2                                       | 0.27                             | 0.08-0.93     | 1012 (99.80)                  | 1014 (2.91)                            | 0, p = 0.52                                                   |
|                          | Sub-Saharan Africa                        | 19 (44.19)                         | 1774                                    | 14.34                            | 9.94-20.26    | 8240 (82.3)                   | 10014 (28.74)                          | 97.0, p < 0.01                                                |
|                          | Western, Central Europe and North America | 2 (4.65)                           | 1                                       | 0.17                             | 0.03-0.82     | 901 (99.89)                   | 902 (2.59)                             | 0%, p = 0.92                                                  |

## 242 **Heterogeneity of Included Studies**

243 The overall heterogeneity score was ( $I^2 = 98.2$ ,  $p < 0.001$ ) indicating that the 43 studies included  
244 were highly heterogeneous. By regions, the highest heterogeneity was from studies conducted in  
245 Sub-Saharan Africa ( $I^2 = 97.0$ ,  $p < 0.01$ ), followed by those from Asia and the Pacific ( $I^2 = 96$ ,  $p <$   
246  $0.01$ ). Studies from the Middle East and North Africa, Eastern Europe and Central Asia and  
247 Western, Central Europe and North America had the lowest level of heterogeneity though not  
248 statistically significant as shown in Table 3 and Fig 3. Further investigation revealed that; the year  
249 of publication ( $\alpha\beta -0.047$ ; 95% CI (-0.089; -0.005);  $p=0.027$ ) a study being conducted in the  
250 regions of sub-Saharan Africa ( $\alpha\beta 1.719$ ; 95% CI (0.939; 2.50);  $p<.0001$ ), Latin America and the  
251 Caribbean ( $\alpha\beta -1.89$ ; 95% CI (-3.419; -0.360);  $p=0.016$  and Western, Central Europe and North  
252 America ( $\alpha\beta -2.432$ ; 95% CI (-4.732; -0.131);  $p=0.038$ , significantly accounted for heterogeneity  
253 in the included studies as shown in Table 3.

254

## 255 **Bias and Quality Scores of the Included Studies**

256 Of the 39 cross-sectional studies included, 11 were of high quality (low risk of bias)  
257 [11,27,49,51,56,64,68–72], extra 11 were of good quality (low risk of bias) [3,45–47,52–  
258 54,59,61,73,75], 4 were of low quality (high risk of bias) [9,62,65], whereas the remaining 17 had  
259 a fair rating (moderate risk of bias). All the cohort [76,77] and interventional [78,79] studies  
260 included were of high-quality rating (low risk of bias). Three tables for the quality scores of the  
261 included cross-sectional, cohort and non-randomized interventional studies were generated (S4-

262 S6 Tables). The generated funnel plot was asymmetrical implying the presence of publication bias  
263 in the included studies as indicated in Fig 3.

264 **Fig 3.** Funnel plot showing precision of the 43 included studies on global burden of HIV among  
265 Long-distance truck drivers

266 **Table 3.** Meta-regression analysis for factors attributed to heterogeneity in the 43 included studies

| Factors                                                  | Univariable Analysis                 |                  | Multivariable Analysis                         |                  |
|----------------------------------------------------------|--------------------------------------|------------------|------------------------------------------------|------------------|
|                                                          | Beta Coefficient [ $\beta$ (95% CI)] | P-Value          | Adjusted Beta Coefficient [ $a\beta$ (95% CI)] | P-Value          |
| Year of Publication                                      | <b>-0.0926 (-0.1496; -0.0356 )</b>   | <b>0.0015</b>    | <b>-0.0471 (-0.0889; -0.00530)</b>             | <b>0.0272</b>    |
| Cross-sectional                                          | 0 (Reference)                        |                  | (Reference)                                    |                  |
| Integrated Biological and Behavioral Surveillance Survey | 1.3054 (-2.3415; 4.9524)             | 0.4829           | -                                              | -                |
| Interventional Study (Baseline)                          | -0.8257 (-4.5925; 2.9410)            | 0.6674           | -                                              | -                |
| National Cross-sectional Survey                          | -0.7883 (-2.4453; 0.8687)            | 0.3511           | -                                              | -                |
| National Sentinel Survey                                 | -1.3328 (-3.5352; 0.8696)            | 0.2356           | -                                              | -                |
| Prospective-Cohort (after follow up)                     | 0.2142 (-3.4331; 3.8614)             | 0.9084           | -                                              | -                |
| Prospective-Cohort (baseline)                            | 1.4784 (-2.1583; 5.1150)             | 0.4256           | -                                              | -                |
| Quasi-experimental (Baseline)                            | -2.8932 (-6.6319; 0.8455)            | 0.1293           | -                                              | -                |
| Africa                                                   | (Reference)                          |                  | (Reference)                                    |                  |
| Asia                                                     | <b>-2.1298 (-2.9251; -1.3346)</b>    | <b>&lt;.0001</b> | -                                              | -                |
| North-America                                            | <b>-4.5640 (-6.9469; -2.1810)</b>    | <b>0.0002</b>    | -                                              | -                |
| South-America                                            | <b>-3.7862 (-5.4022; -2.1702)</b>    | <b>&lt;.0001</b> | -                                              | -                |
| Asia and the Pacific                                     | (Reference)                          |                  | (Reference)                                    |                  |
| Eastern Europe and Central Asia                          | -0.4110 (-2.7547; 1.9326)            | 0.7310           | -0.3783 (-2.5765; 1.8198)                      | 0.7359           |
| Latin America and The Caribbean                          | <b>-1.8525 (-3.4633; -0.2418)</b>    | <b>0.0242</b>    | <b>-1.8894 (-3.4190; -0.3599)</b>              | <b>0.0155</b>    |
| Middle East and North Africa                             | <b>-2.3156 (-4.5252; -0.1059)</b>    | <b>0.0400</b>    | -1.8859 (-4.0435; 0.2717)                      | 0.0867           |
| Sub-Saharan Africa                                       | <b>1.9314 (1.1236; 2.7391)</b>       | <b>&lt;.0001</b> | <b>1.7193 (0.9389; 2.4998)</b>                 | <b>&lt;.0001</b> |
| Western, Central Europe and North America                | <b>-2.6357 (-5.0051; -0.2663)</b>    | <b>0.0292</b>    | <b>-2.4319 (-4.7323; -0.1316)</b>              | <b>0.0383</b>    |
| Mean Age                                                 | -0.0904 (-0.2745; 0.0937 )           | 0.3358           | -                                              | -                |
| Sample Size                                              | -0.0005 (-0.0011; 0.0001)            | 0.0789           | -                                              | -                |
| Determine & Oraquick                                     | (Reference)                          |                  | (Reference)                                    |                  |
| EIA; Innotest HIV-1/HIV-2                                | 2.4965 (-2.3420; 7.3350)             | 0.3119           | -                                              | -                |
| ELISA                                                    | 0.9683 (-2.5096; 4.4463)             | 0.5853           | -                                              | -                |
| ELISA & Western Blot Assay                               | -0.1153 (-3.8185; 3.5878)            | 0.9513           | -                                              | -                |
| GAL ELISA HIV I/II                                       | 4.3251 (-0.5073; 9.1575)             | 0.0794           | -                                              | -                |
| OraQuick                                                 | -2.1215 (-7.6892; 3.4462 )           | 0.4552           | -                                              | -                |
| Orasure                                                  | 3.1110 (-1.7173; 7.9393)             | 0.2066           | -                                              | -                |
| Rapid Assay Test                                         | 1.8902 (-2.9451; 6.7256)             | 0.4436           | -                                              | -                |
| Quality Score                                            | -0.2063 (-0.5741; 0.1616)            | 0.2718           | -                                              | -                |

## 268 **Discussion**

269 This systematic review and meta-analysis purposed to quantify the global burden of HIV infections  
270 among LDTDs. The findings from this study demonstrate substantial evidence of high levels of  
271 HIV across LDTDs of diverse geographical backgrounds such as sub-Saharan Africa, Asia and the  
272 Pacific. While for a long time LDTDs were understood to be both most at-risk  
273 [5,6,9,13,15,17,19,80] and a hard-to-reach population [3,4,18,27], this is even the pioneer study to  
274 systematically determine and report the extent of the burden of HIV in this key population.

275 The pooled prevalence of HIV was 3.82% (95% CI 2.22-6.49). This is nearly six times the current  
276 global HIV prevalence of 0.7% in the adult general population based on the latest UNAIDS report  
277 [1]. This pooled prevalence is higher than those reported for other most-at-risk populations like  
278 sex workers (2.5%), and people in prisons (1.4%), but lower than that of people who inject drugs  
279 (5.0%), gay men and other men who have sex with men (MSMs) (7.7%), and transgender groups  
280 (10.3%) [1]. Moreover, the pooled prevalence was substantially higher compared to the prevalence  
281 of HIV in other migrant populations in high-income countries (2.25%) and low-income countries  
282 (0.23%) [81]. Nevertheless, a recent meta-analysis identified a prevalence of 17.3% among FSWs  
283 in the U.S. [82]. This finding demonstrated that LDTDs endure a high burden of HIV especially  
284 in sub-Saharan Africa, Asia and the Pacific regions. However, this assertion may not suffice for  
285 some regions like Latin America and the Caribbean, Eastern Europe and Central Asia, Middle East  
286 and North Africa and Western, Central Europe and North America, where a very low number of  
287 studies were identified. Indeed, the high burden of HIV may for long have been masked by the  
288 more attention given to other most-at-risk populations, somewhat isolating LDTDs in various HIV  
289 preventive and research programs owing to their hard-to-reach nature [83]. Furthermore, the high  
290 burden may infer delayed success of HIV prevention among this population, which

291 consequentially derail the collective global efforts to fight the epidemic. Therefore, there is a need  
292 to scale up targeted interventions with an emphasis on combination prevention; a holistic approach  
293 with effective structural, biomedical and behavioural HIV prevention services among LDTDs as  
294 recommended by the UNAIDS [20].

295 In the current study, highest pooled prevalence of HIV among LTDs was in sub-Saharan Africa,  
296 followed by the Asia and Pacific region, and the least from Western, Central Europe and North  
297 America. This is so despite the sample size from sub-Saharan Africa (28.74%), being nearly a third  
298 that of the entire study. Thus, the high overall pooled prevalence observed is attributable to the  
299 sub-Saharan Africa region. This trend is consistent with the global burden of HIV in the general  
300 population which is highly concentrated in sub-Saharan Africa [1,20]. Indeed, the 14.34% HIV  
301 prevalence which is about five times that of the general population estimated to be around 3% in  
302 the region [1] mirror our global pooled prevalence which is almost six times that in general  
303 population. Moreover, a high burden of HIV among LDTDs was concentrated in the Eastern [48–  
304 50,65,77] and Southern [3,27,72] regions of sub-Saharan Africa, compared to the Western and  
305 Central Africa region, reflecting the UNAIDS report on HIV trends in the general population  
306 [1,20].

307 The high burden of HIV among LDTDs in sub-Saharan Africa may be attributed to various factors.  
308 First, studies have identified that LDTDs in sub-Saharan Africa mainly solicit commercial sex  
309 from FSWs, who equally share a disproportionately high burden of HIV [19,72,84]. Sexual  
310 interactions between LDTDs and commercial sex workers are known to be characterized by risky  
311 sexual behaviours [19], which increases the risk of HIV infection. Additionally, limited access and  
312 inadequate HIV preventive services among LDTDs along most transport routes in sub-Saharan  
313 Africa [3,61,85] , increase their vulnerability to HIV. Furthermore, due to limited healthcare

314 resources in most sub-Saharan African countries, LDTDs may find themselves ineligible for HIV  
315 preventive services across different geographic borders [26]. The high burden of HIV among  
316 LDTDs in sub-Saharan Africa may partially be a driving factor to the high burden sustained in the  
317 region. Thus, in order to sustain the currently reducing HIV incidence rates in sub-Saharan Africa,  
318 enhanced targeted HIV preventive services among the LDTDs are needed to match those offered  
319 in other most-at-risk populations like the FSWs.

320 The 2.14% prevalence of HIV among LDTDs in Asia and the Pacific is above the estimates of  
321 below 1% in the general population in the region [1]. However, the prevalence reported by  
322 individual studies widely varied, with some studies from India reporting a prevalence of above  
323 15% [55,58,64], compared to a prevalence of 0% in Bangladesh [56] and China [51]. Thus, this  
324 evidence also demonstrates the need for enhanced HIV preventive services among LDTDs in Asia  
325 and the Pacific.

326 There was a low number of studies identified from Latin America and the Caribbean, Western,  
327 Central Europe and North America, Middle East and North Africa and Eastern Europe and Central  
328 Asia, with each region having less than three studies. Ultimately, the data from these regions is  
329 inadequate to make a conclusive comparison in the context of the current study. This may be due  
330 to underreporting of HIV prevalence or a lack of studies that focus on HIV among LDTDs in those  
331 regions. Indeed, given the relative low burden of HIV in those regions [1], LDTDs' centred  
332 research has been focused on other healthcare needs [12,44,86–89]. However, this school of  
333 thought may not be completely true, given the recent sharp increase in incidence rates of HIV in  
334 some of the regions mentioned above like the Middle East, North Africa and Eastern Europe [1].  
335 Nevertheless, the HIV prevalence reported in the individual studies still demonstrates a substantial  
336 prevalence of HIV which needs intervention mechanisms. Thus, more LDTDs' centred research

337 and HIV surveillance activities are needed to guide the formulation of suitable targeted strategies,  
338 policies and interventions to prevent new infections among them.

339 This review identified an overall heterogeneity of 98.2%,  $p < 0.001$  in the included studies. This  
340 was mainly attributable to the year of publication and studies being conducted in sub-Saharan  
341 Africa, Latin America and the Caribbean, and Western, Central Europe and North America. More  
342 specifically, most of the included HIV prevalence studies were published before 2010. Indeed,  
343 only two studies have been conducted in the last five years on HIV prevalence among LDTDs  
344 [46,73]. This is an indication of a decelerating or stagnated body of evidence on HIV among  
345 LDTDs in different parts of the world. Such a scenario is likely to mask and drive a silent  
346 disproportionately high burden of HIV in this population. Thus, more studies and surveillance are  
347 needed in individual countries to generate reliable up-to-date HIV prevalence estimates for more  
348 appropriate targeted interventions.

349 Several limitations should be considered when interpreting the findings of this review. One, the  
350 review included all existing studies on HIV prevalence among LDTDs since the start of the  
351 epidemic. Thus, a portion of the data may not be up-to-date. However, given the lack of any  
352 existing review of this kind, the current study was warranted. Second, the review focused on  
353 studies only published in the English language, meaning that some data published in other  
354 languages may have been left out, thus possibly underestimating or overestimating the global  
355 burden of HIV among LDTDs. The high heterogeneity in the included studies may limit the  
356 generalizability of the findings especially from regions where there was a huge scarcity of data.  
357 The diversity of study settings, year of publication, sample size, and socioeconomic factors among  
358 the study sample may also limit the generalizability of the findings. Lastly, some databases that



359 are not open access were not searched for the information included in the current study. It may be  
360 that some important information in those databases was left out in this review.

## 361 **Conclusion**

362 The global burden of HIV among LDTDs is 3.82%. This burden is highest in sub-Saharan Africa  
363 at 14.34%, followed by Asia and the Pacific at 2.14%, and the lowest in Western, Central Europe  
364 and North America at 0.17%. More LDTD-centred research and surveillance on HIV prevalence  
365 is recommended in individual countries. This would be pivotal in instituting tailored national and  
366 regional strategies, policies and interventions suitable for preventing new HIV infections among  
367 LDTDs.

## 368 **Acknowledgements**

369 We acknowledge the faculty of Nursing, Jomo Kenyatta University of Agriculture and Technology  
370 for their input during the preliminary presentation of this study.

## 371 **Authors' contributions**

372 **Conceptualization:** Cyrus Mutie, Berrick Otieno, Grace Mbuthia

373 **Design and Methodology:** Cyrus Mutie, Berrick otieno, Grace Mbuthia

374 **Formal analysis:** Cyrus Mutie, Berrick Otieno

375 **Supervision:** Elijah Mwangi, Rosemary Kawira, Albanus Mutisya, John Gachohi, Grace Mbuthia

376 **Writing – original draft:** Cyrus Mutie

377 **Writing – review and editing:** Elijah Mwangi, Rosemary Kawira, Albanus Mutisya, John  
378 Gachohi, Grace Mbuthia

379

## 380 **References**

- 381 1. UNAIDS. The path that ends AIDS: UNAIDS Global AIDS Update 2023 [Internet]. 2023  
382 [cited 2023 Jul 16]. Available from:  
383 [https://www.unaids.org/sites/default/files/media\\_asset/2023-unaids-global-aids-](https://www.unaids.org/sites/default/files/media_asset/2023-unaids-global-aids-)  
384 [update\\_en.pdf](https://www.unaids.org/sites/default/files/media_asset/2023-unaids-global-aids-update_en.pdf)
- 385 2. Baral S, Beyrer C, Muessig K, Poteat T, Wirtz AL, Decker MR, et al. Burden of HIV among  
386 female sex workers in low-income and middle-income countries: a systematic review and  
387 meta-analysis. *Lancet Infect Dis*. 2012 Jul;12(7):538–49.
- 388 3. Delany-Moretlwe S, Bello B, Kinross P, Oliff M, Chersich M, Kleinschmidt I, et al. HIV  
389 prevalence and risk in long-distance truck drivers in South Africa: a national cross-sectional  
390 survey. *Int J STD AIDS*. 2014 May;25(6):428–38.
- 391 4. Strauss M, George G, Mantell JE, Romo ML, Mwai E, Nyaga EN, et al. Stated and revealed  
392 preferences for HIV testing: can oral self-testing help to increase uptake amongst truck  
393 drivers in Kenya? *BMC Public Health*. 2018 Nov 6;18(1):1231.
- 394 5. Sawal N, Hans GDR, Verma G. Sexual practices, myths and misconceptions among long  
395 distance truck drivers in North India. *QJM: An International Journal of Medicine*. 2016 Jul  
396 1;109(7):467–72.
- 397 6. Sunmola AM. Sexual practices, barriers to condom use and its consistent use among long  
398 distance truck drivers in Nigeria. *AIDS Care*. 2005 Feb;17(2):208–21.

- 399 7. Ulibarri MD, Strathdee SA, Lozada R, Staines-Orozco HS, Abramovitz D, Semple S, et al.  
400 Condom use among female sex workers and their non-commercial partners: effects of a  
401 sexual risk intervention in two Mexican cities. *Int J STD AIDS*. 2012 Apr;23(4):229–34.
- 402 8. Yaya I, Landoh DE, Saka B, Vignikin K, Aboubakari AS, N’dri KM, et al. Consistent  
403 Condom Use during Casual Sex among Long-Truck Drivers in Togo. Pandey D, editor. *PLoS*  
404 *ONE*. 2016 Apr 12;11(4):e0153264.
- 405 9. Atilola GO, Akpa OM, Komolafe IOO. HIV/AIDS and the long-distance truck drivers in  
406 south-west Nigeria: a cross-sectional survey on the knowledge, attitude, risk behaviour and  
407 beliefs of truckers. *J Infect Public Health*. 2010 Dec;3(4):166–78.
- 408 10. Mutie C, Kairu-Wanyoike S, Mambo S, Ngoge R, Gachohi J. Frequency of sexual  
409 interactions and associated factors among long-distance truck drivers operating along the  
410 Northern Corridor Highway, Kenya. *Pan Afr Med J*. 2021;40:194.
- 411 11. Pandey A, Mishra RM, Sahu D, Benara SK, Biswas M, Sengupta U, et al. Heterosexual risk  
412 behaviour among long distance truck drivers in India: Role of marital status. *Indian Journal*  
413 *of Medical Research*. 2012 Oct 1;136(7):44.
- 414 12. Bragazzi NL, Dini G, Toletone A, Rahmani A, Montecucco A, Massa E, et al. Patterns of  
415 Harmful Alcohol Consumption among Truck Drivers: Implications for Occupational Health  
416 and Work Safety from a Systematic Review and Meta-Analysis. *Int J Environ Res Public*  
417 *Health*. 2018 Jun;15(6):1121.

- 418 13. Maarefvand M, Kassaie B, Ghiasvand H, Abolfathi Gharibdoosti R, Khubchandani J. Sexual  
419 and Drug Use Risk Behaviors of Internal Long Distance Truck Drivers in Iran. *Iran J Public*  
420 *Health*. 2016 May;45(5):606–13.
- 421 14. McCree DH, Cosgrove S, Stratford D, Valway S, Keller N, Vega-Hernandez J, et al. Sexual  
422 and Drug Use Risk Behaviors of Long-Haul Truck Drivers and Their Commercial Sex  
423 Contacts in New Mexico. *Public Health Rep*. 2010 Jan;125(1):52–60.
- 424 15. Apostolopoulos Y, Sönmez S, Shattell M, Kronenfeld J, Smith D, Stanton S. Cruising for  
425 Truckers on Highways and the Internet: Sexual Networks and Infection Risk. *AIDS*  
426 *Education and Prevention*. 2011 Jun;23(3):249–66.
- 427 16. Apostolopoulos Y, S S, K M. Sexual mixing, drug exchanges, and infection risk among long-  
428 haul truck drivers. *Journal of community health*. 2013 Apr;38(2):385–91.
- 429 17. Apostolopoulos Y, Sönmez S, Lemke MK, Rothenberg RB. Mapping U.S. long-haul truck  
430 drivers' multiplex networks and risk topography in inner-city neighborhoods. *Health Place*.  
431 2015 Jul;34:9–18.
- 432 18. Mutie C, Kairu-Wanyoike S, Mambo S, Ngoge R, Gachohi J. Spatial distribution of sexual  
433 network locations used by long-distance truck drivers along the Northern Corridor highway,  
434 Kenya. *International Health*. 2023 Mar 25;ihad021.
- 435 19. Makhakhe NF, Lane T, McIntyre J, Struthers H. Sexual transactions between long distance  
436 truck drivers and female sex workers in South Africa. *Global Health Action*. 2017  
437 Jan;10(1):1346164.

- 438 20. UNAIDS. IN DANGER: UNAIDS Global AIDS Update 2022. 2022 p. 376.
- 439 21. Mutie C, Kairu-Wanyoike S, Mambo S, Ngoge R, Gachohi J. Utilization of HIV and Sexually  
440 Transmitted Infections Prevention Services, and Associated Factors among the Long-  
441 Distance Truck Drivers along the Northern Corridor Highway, Kenya. *Advances in Sexual  
442 Medicine*. 2021 Jun 3;11(3):39–58.
- 443 22. Kohli A, Kerrigan D, Brahmabhatt H, Likindikoki S, Beckham J, Mwampashi A, et al. Social  
444 and structural factors related to HIV risk among truck drivers passing through the Iringa  
445 region of Tanzania. *AIDS Care*. 2017 Aug;29(8):957–60.
- 446 23. Lawal AM, Olley BO. Psychosocial factors predicting risky sexual behaviour among long  
447 distance truck drivers in Lagos, Nigeria. *SAHARA J*. 2017 Dec;14(1):213–21.
- 448 24. Romo ML, George G, Mantell JE, Mwai E, Nyaga E, Odhiambo JO, et al. Psychosocial  
449 characteristics of primary care-seeking long-distance truck drivers in Kenya and associations  
450 with HIV testing. *Afr J AIDS Res*. 2018 Jul;17(2):119–28.
- 451 25. Romo ML, George G, Mantell JE, Mwai E, Nyaga E, Strauss M, et al. Depression and sexual  
452 risk behavior among long-distance truck drivers at roadside wellness clinics in Kenya. *PeerJ*.  
453 2019 Jul 18;7:e7253.
- 454 26. Mantell JE, Khalifa A, Christian SN, Romo ML, Mwai E, George G, et al. Preferences,  
455 beliefs, and attitudes about oral fluid and blood-based HIV self-testing among truck drivers  
456 in Kenya choosing not to test for HIV. *Frontiers in Public Health* [Internet]. 2022 [cited 2023  
457 Feb 11];10. Available from:  
458 <https://www.frontiersin.org/articles/10.3389/fpubh.2022.911932>

- 459 27. Botão C, Horth RZ, Frank H, Cummings B, Inguane C, Sathane I, et al. Prevalence of HIV  
460 and Associated Risk Factors Among Long Distance Truck Drivers in Inchope, Mozambique,  
461 2012. *AIDS Behav.* 2016 Apr;20(4):811–20.
- 462 28. Dobra A, Bärnighausen T, Vandormael A, Tanser F. Space-time migration patterns and risk  
463 of HIV acquisition in rural South Africa. *AIDS.* 2017 Jan 2;31(1):137–45.
- 464 29. Mandawa MB, Mahiti GR. Factors Contributing to Loss to Follow-Up from HIV Care  
465 Among Men Living with HIV/AIDS in Kibaha District, Tanzania. *HIV AIDS (Auckl).* 2022  
466 Nov 9;14:503–16.
- 467 30. Adal M. Systematic review on HIV situation in Addis Ababa, Ethiopia. *BMC Public Health.*  
468 2019 Nov 21;19:1544.
- 469 31. Zhang X, Chow EP, Wilson DP, Sun X, Zhao R, Zhang J, et al. Prevalence of HIV and  
470 syphilis infections among long-distance truck drivers in China: a data synthesis and meta-  
471 analysis. *International Journal of Infectious Diseases.* 2013;17(1):e2–7.
- 472 32. Page MJ, McKenzie JE, Bossuyt PM, Boutron I, Hoffmann TC, Mulrow CD, et al. The  
473 PRISMA 2020 statement: an updated guideline for reporting systematic reviews. *BMJ.* 2021  
474 Mar 29;372:n71.
- 475 33. Ouzzani M, Hammady H, Fedorowicz Z, Elmagarmid A. Rayyan — a web and mobile app  
476 for systematic reviews. *Systematic Reviews [Internet].* 2016 [cited 2023 Jul 24]. Available  
477 from: <https://www.rayyan.ai/cite/>

- 478 34. Munn Z, Moola S, Lisy K, Riitano D, Tufanaru C. Methodological guidance for systematic  
479 reviews of observational epidemiological studies reporting prevalence and cumulative  
480 incidence data. *Int J Evid Based Healthc*. 2015 Sep;13(3):147–53.
- 481 35. Joanna Briggs Institute. Joanna Briggs Institute (JBI) Critical Appraisal Tools [Internet].  
482 2020 [cited 2023 Sep 12]. Available from: <https://jbi.global/critical-appraisal-tools>
- 483 36. Wells G, Shea B, O’Connell D, Peterson J, Welch V, Losos M, et al. The Newcastle-Ottawa  
484 Scale (NOS) for assessing the quality of nonrandomised studies in meta-analyses [Internet].  
485 2013 [cited 2023 Jul 31]. Available from:  
486 [https://www.ohri.ca/programs/clinical\\_epidemiology/oxford.asp](https://www.ohri.ca/programs/clinical_epidemiology/oxford.asp)
- 487 37. R Core Team. R: The R Project for Statistical Computing [Internet]. 2018 [cited 2021 Mar  
488 1]. Available from: <https://www.r-project.org/>
- 489 38. Barendregt JJ, Doi SA, Lee YY, Norman RE, Vos T. Meta-analysis of prevalence. *J*  
490 *Epidemiol Community Health* [Internet]. 2013 Nov 1 [cited 2023 Jun 1];67(11):974–8.  
491 Available from: <https://jech.bmj.com/content/67/11/974>
- 492 39. Lin L, Chu H, Hodges JS. Alternative measures of between-study heterogeneity in meta-  
493 analysis: Reducing the impact of outlying studies. *Biometrics* [Internet]. 2017 [cited 2023  
494 Jun 1];73(1):156–66. Available from:  
495 <https://onlinelibrary.wiley.com/doi/abs/10.1111/biom.12543>
- 496 40. Melsen WG, Bootsma MCJ, Rovers MM, Bonten MJM. The effects of clinical and statistical  
497 heterogeneity on the predictive values of results from meta-analyses. *Clinical Microbiology*

- 498 and Infection [Internet]. 2014 Feb 1 [cited 2023 Jun 1];20(2):123–9. Available from:  
499 [https://www.clinicalmicrobiologyandinfection.com/article/S1198-743X\(14\)60045-8/fulltext](https://www.clinicalmicrobiologyandinfection.com/article/S1198-743X(14)60045-8/fulltext)
- 500 41. Adjei AA, Atta PB, Krampa F, Lartey M, Rahman MA, Agyeman S, et al. Human  
501 immunodeficiency virus, Hepatitis B virus and syphilis infections among longdistance truck  
502 drivers in, a Port City in Ghana. *Afr j infect dis (Online)*. 2016;10(1):10–6.
- 503 42. AIDS Analysis Africa. HIV and STD prevalence among bus and truck drivers in Cameroon.  
504 *AIDS Anal Afr*. 1994;4(5):2.
- 505 43. Azuonwu O, Erhabor O, Frank-Peterside N. HIV infection in long-distance truck drivers in  
506 a low income setting in the Niger Delta of Nigeria. *Journal of community health*.  
507 2011;36:583–7.
- 508 44. Bachmann LH, Lichtenstein B, St Lawrence JS, Murray M, Russell GB, Hook EW. Health  
509 Risks of American Long Distance Truckers: Results from a Multi-Site Assessment. *J Occup  
510 Environ Med*. 2018 Jul;60(7):e349–55.
- 511 45. Bal B, Ahmed SI, Mukherjee R, Chakraborty S, Niyogi SK, Talukder A, et al. HIV infection  
512 among transport workers operating through Siliguri-Guwahati national highway, India.  
513 *Journal of the International Association of Physicians in AIDS Care*. 2007;6(1):56–60.
- 514 46. Biswas S, Chakraborty D, Ghosh P, Kumar P, Adhikary R, Saha MK. HIV Risk profile and  
515 its socio-demographic correlates among long-distance truckers in West Bengal, India:  
516 Evidence from national HIV sentinel surveillance 2017. *Indian J Public Health*. 2020  
517 Apr;64(Supplement):S8–14.



- 518 47. Botros BA, Aliyev QM, Saad MD, Michael AA, Sanchez JL, Carr JK, et al. HIV infection  
519 and associated risk factors among long–distance truck drivers travelling through Azerbaijan.  
520 International journal of STD & AIDS. 2009;20(7):477–82.
- 521 48. Bwayo J, AM O, AN M, W J, C SK, J K, et al. Long distance truck-drivers: 1. Prevalence of  
522 sexually transmitted diseases (STDs). East African medical journal. 1991 Jun;68(6):425–9.
- 523 49. Bwayo J, F P, M O, A M, S M, J NA, et al. Human immunodeficiency virus infection in long-  
524 distance truck drivers in east Africa. Archives of internal medicine. 1994 Jun;154(12):1391–  
525 6.
- 526 50. Carswell JW, Lloyd G, Howells J. Prevalence of HIV-1 in east African lorry drivers. AiDS.  
527 1989;3(11):759–62.
- 528 51. Chen XS, Yin YP, Gong XD, Liang GJ, Zhang WY, Poumerol G, et al. Prevalence of sexually  
529 transmitted infections among long-distance truck drivers in Tongling, China. International  
530 journal of STD & AIDS. 2006;17(5):304–8.
- 531 52. Diallo BL, Alary M, Rashed S, Barry A. [HIV prevalence, associated risk factors and  
532 evolution among truck drivers from 2001 to 2007 in Guinea]. Med Trop (Mars). 2011  
533 Apr;71(2):142–6.
- 534 53. Dude A, Oruganti G, Kumar V, Mayer KH, Yeldandi V, Schneider JA. HIV Infection,  
535 Genital Symptoms and Sexual Risk Behavior among Indian Truck Drivers from a Large  
536 Transportation Company in South India. J Glob Infect Dis. 2009 Jan;1(1):21–8.

- 537 54. García PJ, Fazio B, Bayer AM, Lizarraga AG, Chiappe M, La Rosa S, et al. Sexual health  
538 knowledge and practices and STI/HIV prevalence among long-distance truck drivers in Peru.  
539 SAGE Open Med. 2017 Dec 12;5:2050312117746308.
- 540 55. Gawande AV, Vasudeo ND, Zodpey SP, Khandait DW. Sexually transmitted infections in  
541 long distance truck drivers. The Journal of Communicable Diseases. 2000;32(3):212–5.
- 542 56. Gibney L, Saquib N, Metzger J, Choudhury P, Siddiqui M, Hassan M. Human  
543 immunodeficiency virus, hepatitis B, C and D in Bangladesh’s trucking industry: prevalence  
544 and risk factors. International Journal of Epidemiology. 2001 Aug;30(4):878.
- 545 57. Jabbari H, Alinaghi SAS, Kheir, ish P, Javid GRE, Rasolinejad M, et al. Lack of HIV  
546 infection among truck drivers in Iran using rapid HIV test. Journal of Research in Medical  
547 Sciences. 2010 Oct;15(5):287–9.
- 548 58. Jindal N, Arora U, Singh K. Prevalence of human immunodeficiency virus (HIV), hepatitis  
549 B virus, and hepatitis C virus in three groups of populations at high risk of HIV infection in  
550 Amritsar (Punjab), Northern India. Jpn J Infect Dis. 2008 Jan;61(1):79–81.
- 551 59. Karimi A, Ghanei Gheshlagh R, Afkhamzadeh A, Faraji O, Rahmani K. Prevalence of HIV  
552 infection and high-risk behaviors in truck and bus drivers in Kurdistan province. BMC Infect  
553 Dis. 2021;21.
- 554 60. Lacerda R, Gravato N, McFarland W, Rutherford G, Iskrant K, Stall R, et al. Truck drivers  
555 in Brazil: prevalence of HIV and other sexually transmitted diseases, risk behavior and  
556 potential for spread of infection. AIDS. 1997 Sep;11 Suppl 1:S15-19.

- 557 61. Lalla-Edward ST, Fischer AE, Venter WF, Scheuermaier K, Meel R, Hankins C, et al. Cross-  
558 sectional study of the health of southern African truck drivers. *BMJ open*.  
559 2019;9(10):e032025.
- 560 62. Lankoande S, Meda N, Sangare L, Compaore IP, Catraye J, Zan S, et al. [HIV infection in  
561 truck drivers in Burkina Faso: a seroprevalence survey]. *Med Trop (Mars)*. 1998;58(1):41–  
562 6.
- 563 63. Li N, Wang Z, Sun D, Zhu Q, Sun G, Yang W, et al. HIV among plasma donors and other  
564 high-risk groups in Henan, China. *JAIDS Journal of Acquired Immune Deficiency*  
565 *Syndromes*. 2010;53:S41–7.
- 566 64. Manjunath JV, Thappa DM, Jaisankar TJ. Sexually transmitted diseases and sexual lifestyles  
567 of long-distance truck drivers: a clinico-epidemiologic study in south India. *International*  
568 *journal of STD & AIDS*. 2002;13(9):612–7.
- 569 65. Mbugua GG, Muthami LN, Mutura CW, Oogo SA, Waiyaki PG, Lindan CP, et al.  
570 Epidemiology of HIV infection among long distance truck drivers in Kenya. *East Afr Med J*.  
571 1995 Aug;72(8):515–8.
- 572 66. Mehret M, Khodakevich L, Zewdie D, Gizaw G, Ayehunie S, Shanko B, et al. HIV-1  
573 infection among employees of the Ethiopian Freight Transport Corporation. *Ethiopian*  
574 *journal of health development*. 1990;4(2).
- 575 67. Mosoko JJ, Macauley IB, Zoungkanyi ACB, Bella A, Koulla-Shiro S. Human  
576 immunodeficiency virus infection and associated factors among specific population  
577 subgroups in Cameroon. *AIDS Behav*. 2007;13(2):277–87.

- 578 68. Mustikawati DE, Morineau G, Nurhayati, Irmaningrum Y, Riono P, Priohutomo S, et al.  
579 Sexual risk taking, sexually transmitted infections and HIV prevalence among four ‘high-  
580 risk’ occupational groups of Indonesian men. *Sexually Transmitted Infections*. 2009 Sep  
581 1;85(5):391–6.
- 582 69. Pandey A, Benara SK, Roy N, Sahu D, Thomas M, Joshi DK, et al. Risk behaviour, sexually  
583 transmitted infections and HIV among long-distance truck drivers: a cross-sectional survey  
584 along national highways in India. *Aids*. 2008;22:S81–90.
- 585 70. Pandey A, Mishra RM, Sahu D, Benara SK, Sengupta U, Paranjape RS, et al. Heading  
586 towards the Safer Highways: an assessment of the Avahan prevention programme among  
587 long distance truck drivers in India. *BMC Public Health*. 2011 Dec 29;11(Suppl 6):S15.
- 588 71. Prem Kumar SG, GA K, R P, JA S, L D, L V, et al. Contact with HIV prevention programmes  
589 & willingness for new interventions among truckers in India. *The Indian journal of medical*  
590 *research*. 2013 Jun;137(6):1061–71.
- 591 72. Ramjee G, Gouws E. Prevalence of HIV among truck drivers visiting sex workers in  
592 KwaZulu-Natal, South Africa. *Sex Transm Dis*. 2002 Jan;29(1):44–9.
- 593 73. Roche J, Vos AG, Lalla-Edward ST, Venter WDF, Scheuermaier K. Relationship between  
594 sleep disorders, HIV status and cardiovascular risk: cross-sectional study of long-haul truck  
595 drivers from Southern Africa. *Occup Environ Med*. 2021 Feb 23;eemed-2020-107208.
- 596 74. Singh YN, Malaviya AN. Long distance truck drivers in India: HIV infection and their  
597 possible role in disseminating HIV into rural areas. *Int J STD AIDS*. 1994 Apr;5(2):137–8.

- 598 75. Valway S, Jenison S, Keller N, Vega-Hernandez J, Hubbard McCree D. Risk Assessment  
599 and Screening for Sexually Transmitted Infections, HIV, and Hepatitis Virus Among Long-  
600 Distance Truck Drivers in New Mexico, 2004–2006. *Am J Public Health*. 2009  
601 Nov;99(11):2063–8.
- 602 76. Lavreys L, Rakwar JP, Thompson ML, Jackson DJ, Mandaliya K, Chohan BH, et al. Effect  
603 of Circumcision on Incidence of Human Immunodeficiency Virus Type 1 and Other Sexually  
604 Transmitted Diseases: A Prospective Cohort Study of Trucking Company Employees in  
605 Kenya. *J INFECT DIS*. 1999 Aug;180(2):330–6.
- 606 77. Rakwar J, Lavreys L, Thompson ML, Jackson D, Bwayo J, Hassanali S, et al. Cofactors for  
607 the acquisition of HIV-1 among heterosexual men: prospective cohort study of trucking  
608 company workers in Kenya. *AIDS*. 1999 Apr 1;13(5):607–14.
- 609 78. Pinho AA, Chinaglia M, Lippman SA, Reingold A, Diaz RS, Sucupira MC, et al. Prevalence  
610 and factors associated with HSV-2 and hepatitis B infections among truck drivers crossing  
611 the southern Brazilian border. *Sex Transm Infect*. 2011 Dec;87(7):553–9.
- 612 79. Schneider JA, Dude A, Dinaker M, Kumar V, Laumann EO, Holloway-Beth A, et al. General  
613 hygiene, sexual risk behaviour and HIV prevalence in truck drivers from Andhra Pradesh,  
614 South India: implications for prevention interventions. *Int J STD AIDS*. 2009 Jan;20(1):39–  
615 45.
- 616 80. Podhisita C, Mj W, A P, U K, R M. Multiple sexual partners and condom use among long-  
617 distance truck drivers in Thailand. *AIDS education and prevention : official publication of*

- 618 the International Society for AIDS Education [Internet]. 1996 Dec [cited 2023 Jul 21];8(6).  
619 Available from: <https://pubmed.ncbi.nlm.nih.gov/9010509/>
- 620 81. Santoso D, Asfia SKBM, Mello MB, Baggaley RC, Johnson CC, Chow EPF, et al. HIV  
621 prevalence ratio of international migrants compared to their native-born counterparts: A  
622 systematic review and meta-analysis. *eClinicalMedicine* [Internet]. 2022 Nov 1 [cited 2023  
623 Aug 23];53. Available from: [https://www.thelancet.com/journals/eclinm/article/PIIS2589-  
624 5370\(22\)00391-1/fulltext](https://www.thelancet.com/journals/eclinm/article/PIIS2589-5370(22)00391-1/fulltext)
- 625 82. Paz-Bailey G, Noble M, Salo K, Tregear SJ. Prevalence of HIV Among U.S. Female Sex  
626 Workers: Systematic Review and Meta-analysis. *AIDS Behav*. 2016 Oct;20(10):2318–31.
- 627 83. Pachauri S, Pachauri A, Mittal K. Sexual Behaviors of Long-Distance Truck Drivers. In:  
628 Pachauri S, Pachauri A, Mittal K, editors. *Sexual and Reproductive Health and Rights in  
629 India: Self-care for Universal Health Coverage* [Internet]. Singapore: Springer; 2022 [cited  
630 2023 Jan 15]. p. 61–76. (SpringerBriefs in Public Health). Available from:  
631 [https://doi.org/10.1007/978-981-16-4578-5\\_5](https://doi.org/10.1007/978-981-16-4578-5_5)
- 632 84. Matovu JKB, Ssebadduka NB. Knowledge, attitudes & barriers to condom use among female  
633 sex workers and truck drivers in Uganda: a mixed-methods study. *Afr Health Sci*. 2013  
634 Dec;13(4):1027–33.
- 635 85. Lalla-Edward ST, Ncube S, Matthew P, Hankins CA, Venter WF, Gomez GB. Uptake of  
636 health services among truck drivers in South Africa: analysis of routine data from nine  
637 roadside wellness centres. *BMC health services research*. 2017 Sep 13;17(1):649.

- 638 86. Bscheiden A, Rothe S, Schöner A, Pijahn N, Stroebele-Benschop N. Food choice patterns of  
639 long-haul truck drivers driving through Germany, a cross sectional study. BMC Nutrition.  
640 2019 Nov 26;5(1):56.
- 641 87. Jensen A, Dahl S. Truck drivers hours-of-service regulations and occupational health. Work.  
642 2009;33(3):363–8.
- 643 88. Khadka A, Gautam P, Joshi E, Pilkington P, Parkin J, Joshi SK, et al. Road safety and heavy  
644 goods vehicle driving in LMICs: Qualitative evidence from Nepal. J Transp Health. 2021  
645 Dec;23:101247.
- 646 89. Narciso FV, Mello MT de. Safety and health of professional drivers who drive on Brazilian  
647 highways. Rev Saúde Pública [Internet]. 2017 Mar 30 [cited 2023 Aug 24];51. Available  
648 from: <https://www.scielo.br/j/rsp/a/d4KP9qt3mHnNgmwNpwDRspf/?lang=en>

## 649 **Supporting Information**

- 650 **S1 Table. A PRISMA checklist showing the specific guideline requirements and page of**  
651 **location in the manuscript. DOCX.**
- 652 **S1 File. Search string from PubMed and PubMed Central (PMC). DOCX.**
- 653 **S2 Table. Summary of the 43 included studies on the global burden of HIV among Long-**  
654 **distance truck drivers. DOCX.**
- 655 **S3 Table. Forest plots showing sub-group analysis by regions, pooled prevalence and**  
656 **heterogeneity scores. DOCX.**
- 657 **S4 Table. Critical appraisal results for quality of the 39 included cross-sectional (prevalence)**  
658 **studies based on Joanna Briggs Checklist. XLSX.**

659 **S5 Table. Quality appraisal for the 2 included Cohort Studies based on New-ottawa Scale for**  
660 **assessing Quality and Bias for Cohort studies. XLSX.**

661 **S6 Table. Quality appraisal for the 2 included non-randomised interventional studies using**  
662 **Joanna Brigs Checklist for non-randomized studies. XLSX.**

663



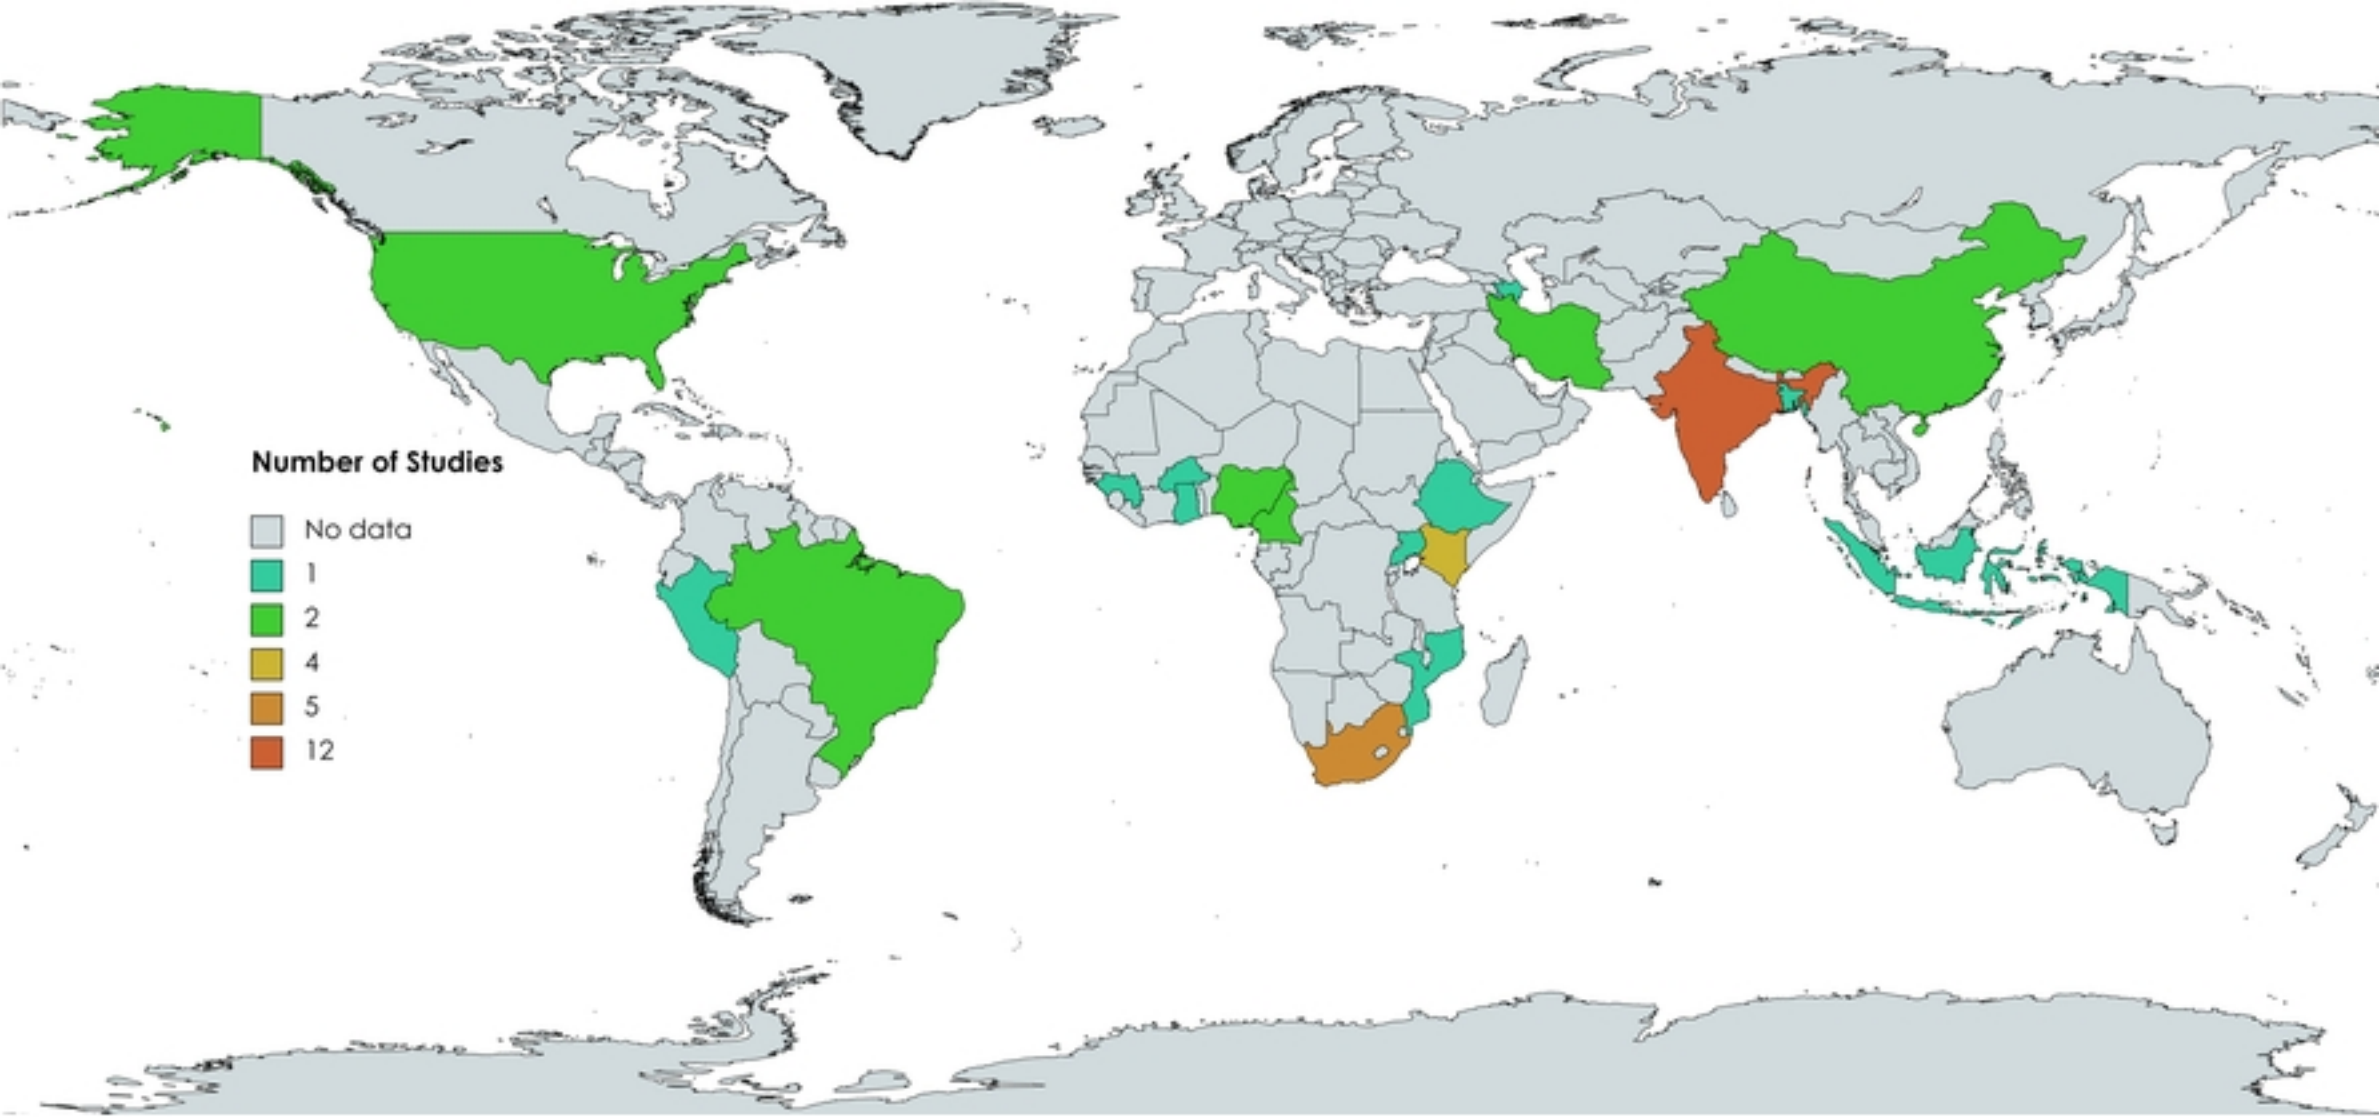

Figure

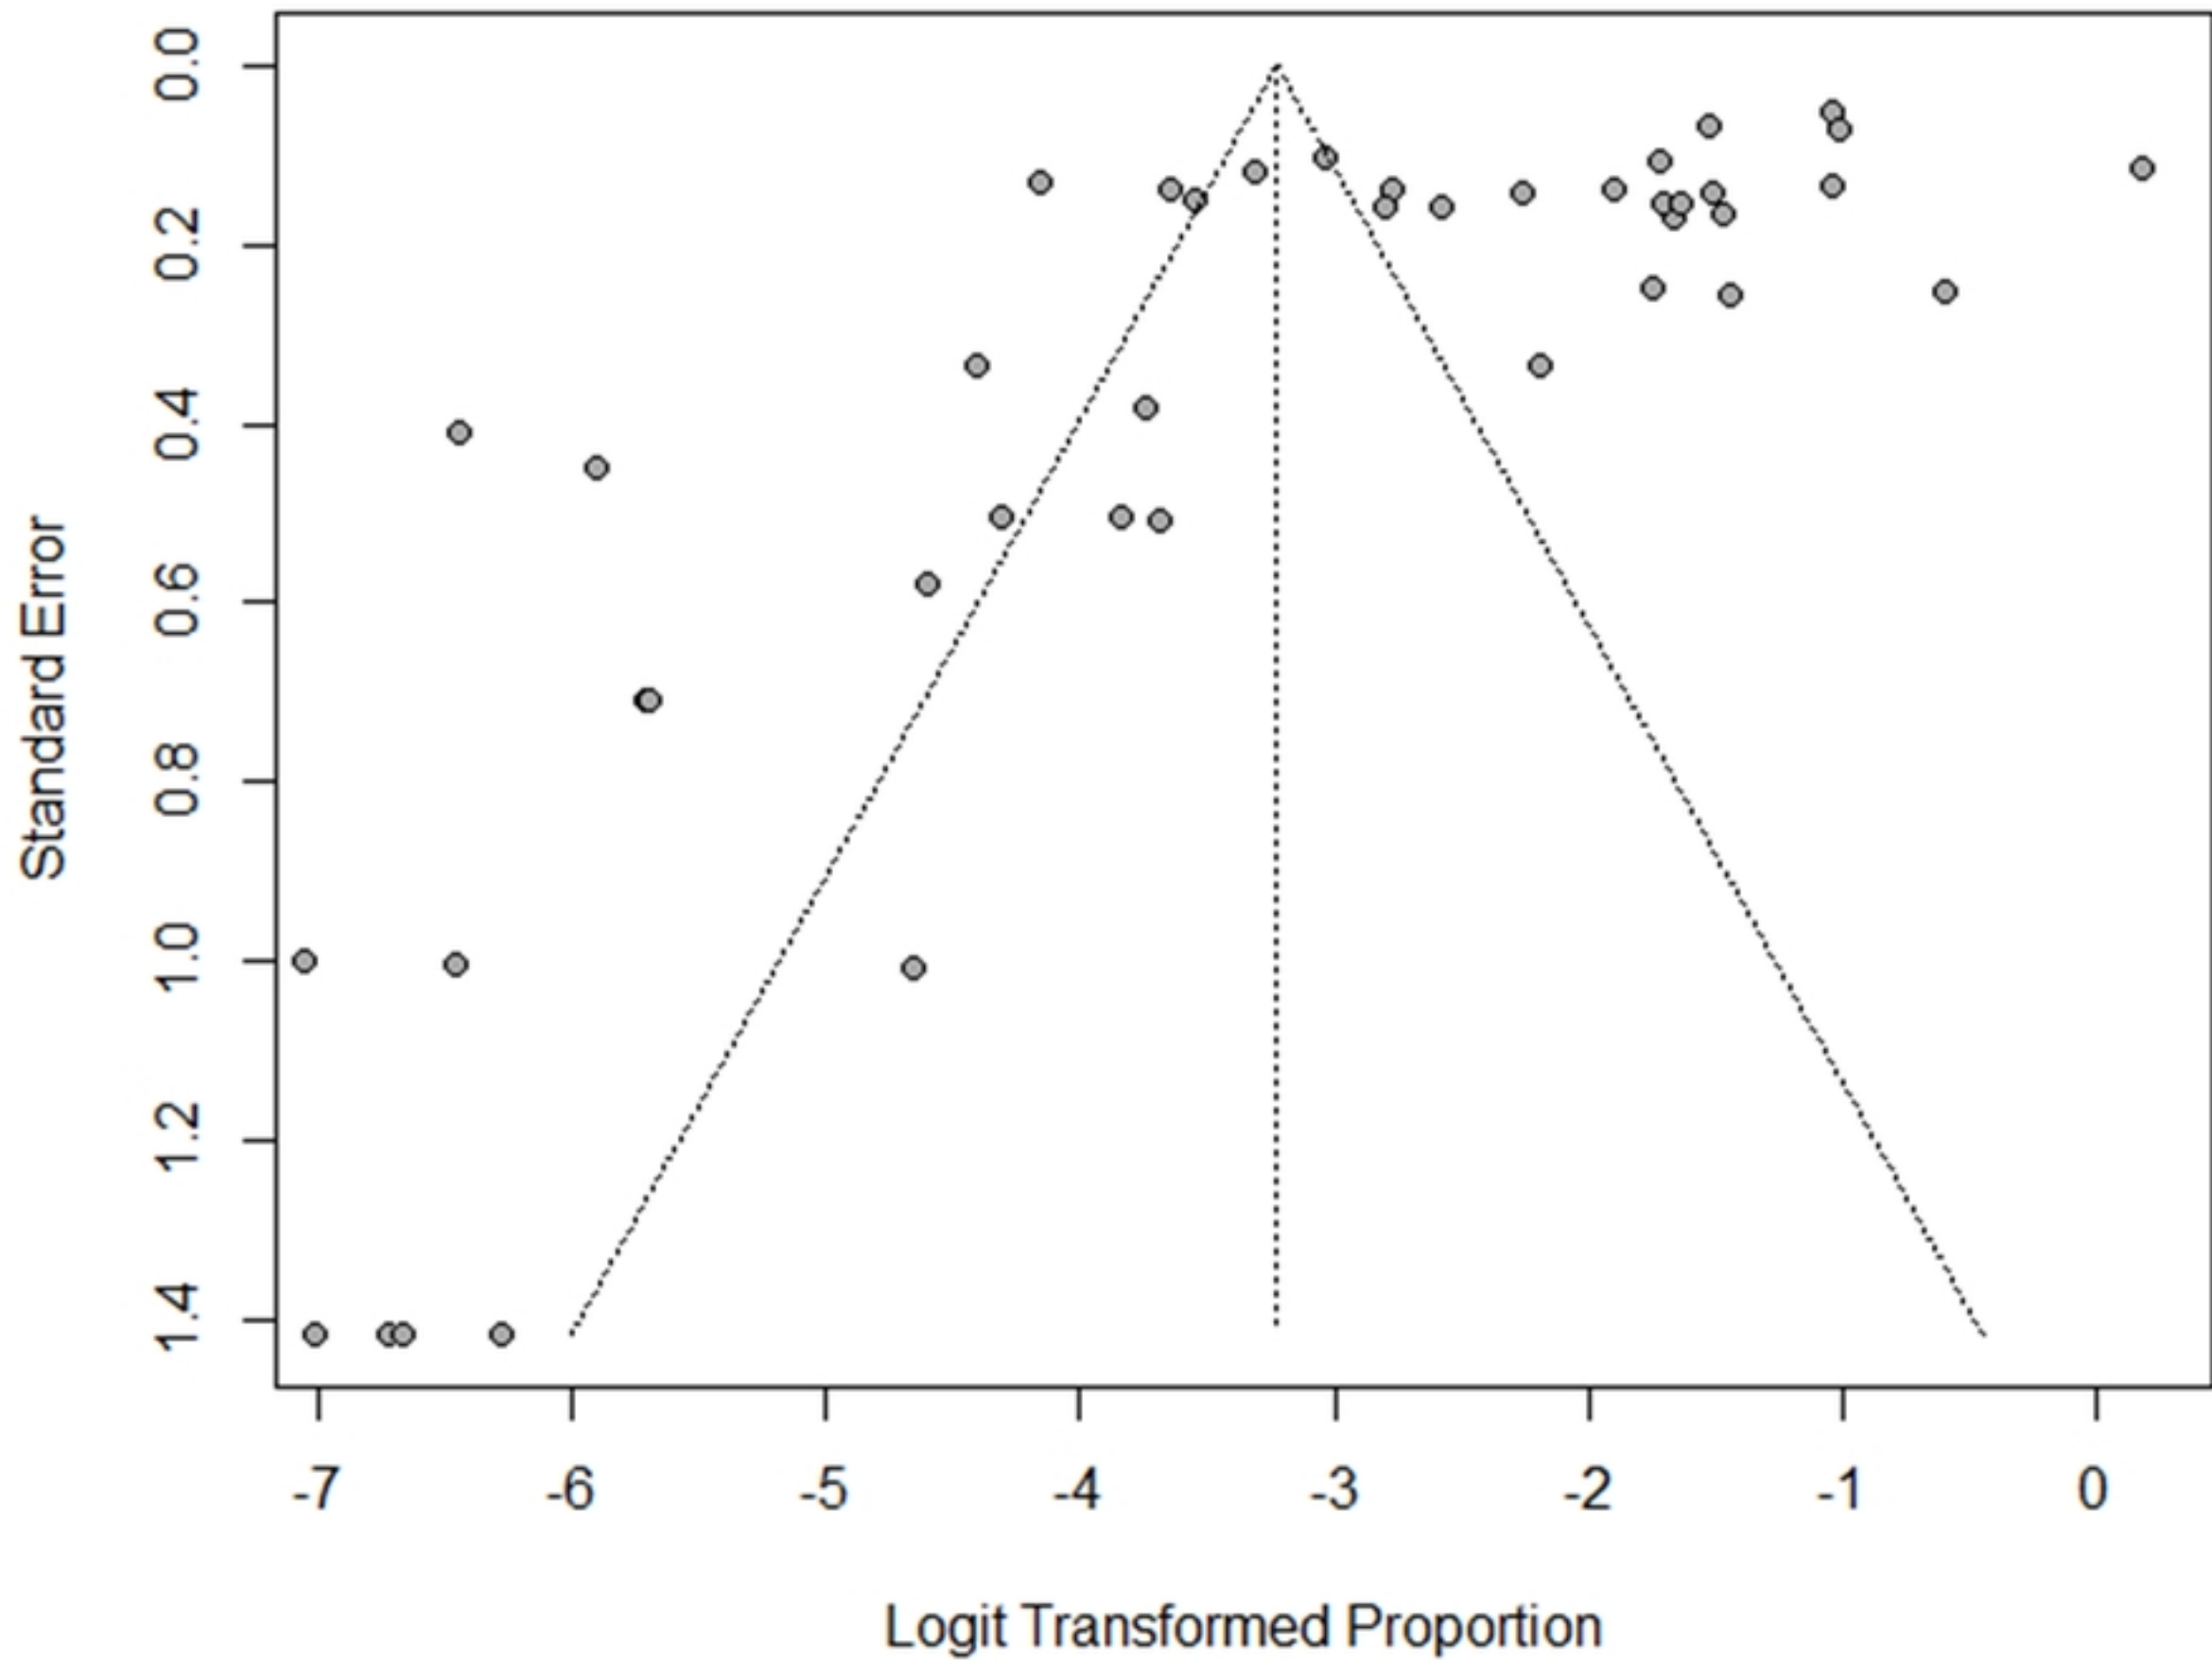

Figure
